# Supplementary material for: Strain tuning of closed topological nodal lines and opposite pockets in quasi-two-dimensional α-phase FeSi2
Source: Royal Society of Chemistry journal article supplement (doi:10.1039/d0cp02334e), 2020-01-01
Supplement: d0cp02334e1.pdf [file d0cp02334e1.pdf]

## Supplementary Information

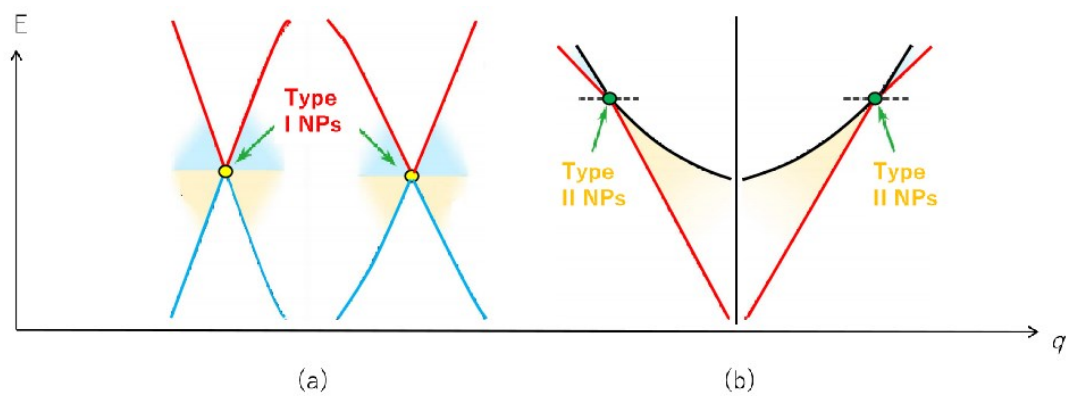

Fig. S1. Schematic diagrams of type I nodal points (a) and type II nodal points (b).

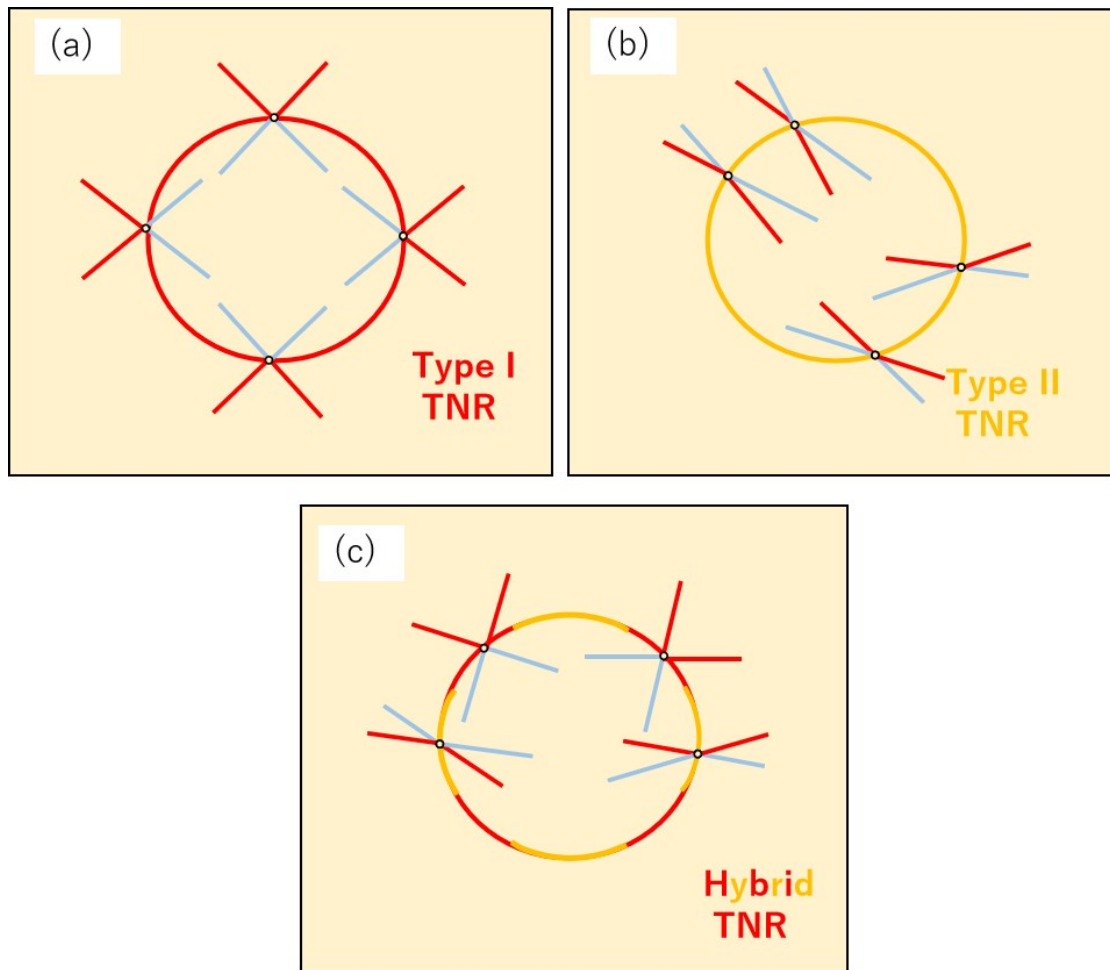

Fig. S2. Schematic diagrams of type I TNR (a), type II TNR (b) and hybrid-type TNR (c).

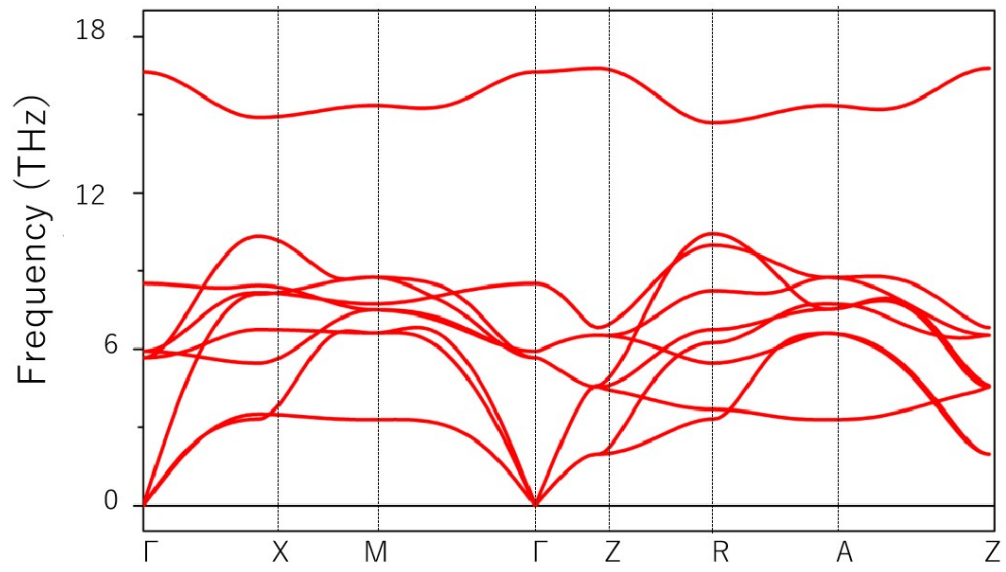

Fig. S3. Calculated phonon dispersion of quasi-2D  $\alpha$ -FeSi<sub>2</sub>.

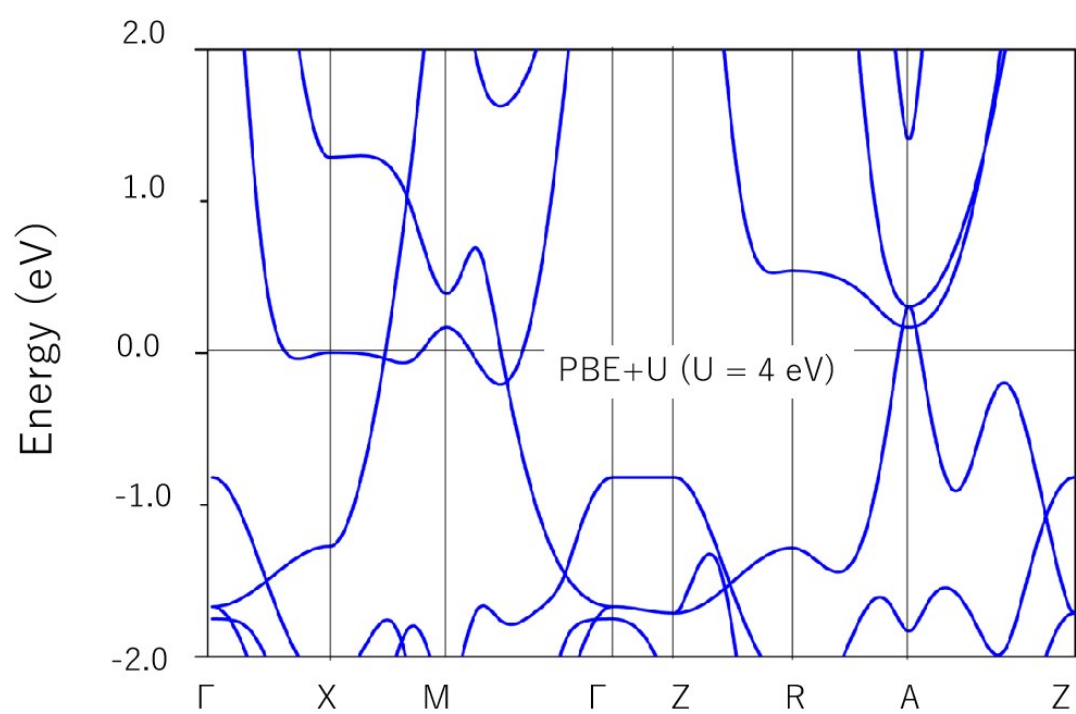

Fig. S4. Calculated band structure of quasi-2D  $\alpha$ -FeSi<sub>2</sub> with U = 4 eV for Fe - *d* orbitals.

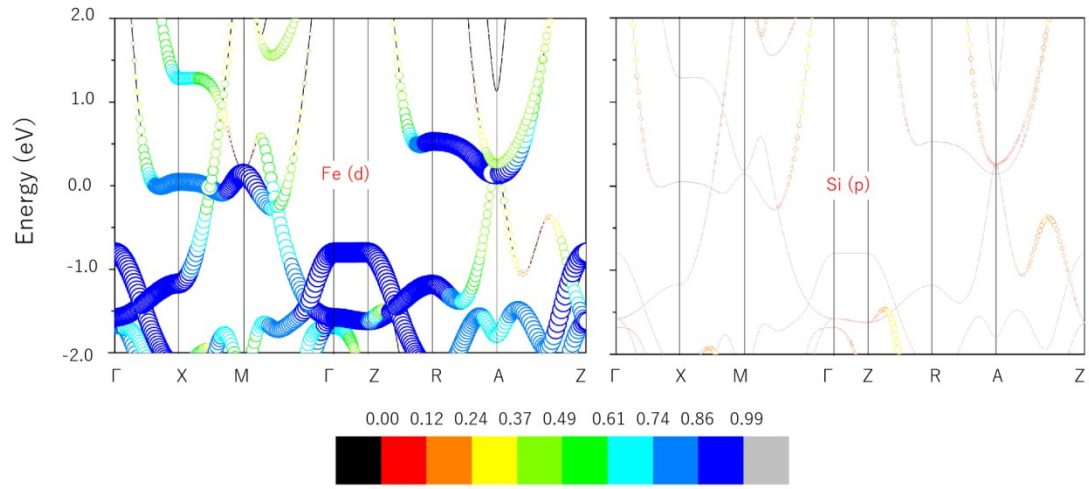

Fig. S5. Calculated orbital-resolved band structures of the Fe (*d*) and Si (*p*) orbitals for quasi-2D  $\alpha$ -FeSi<sub>2</sub>.

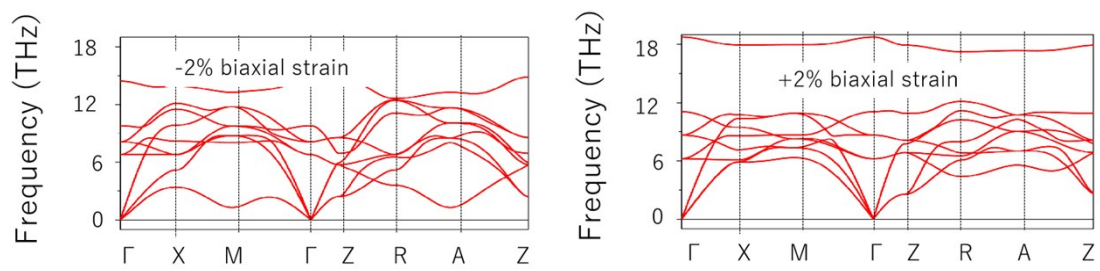

Fig. S6. Calculated phonon dispersions for quasi-2D  $\alpha$ -FeSi<sub>2</sub> under -2% and +2% biaxial strains.

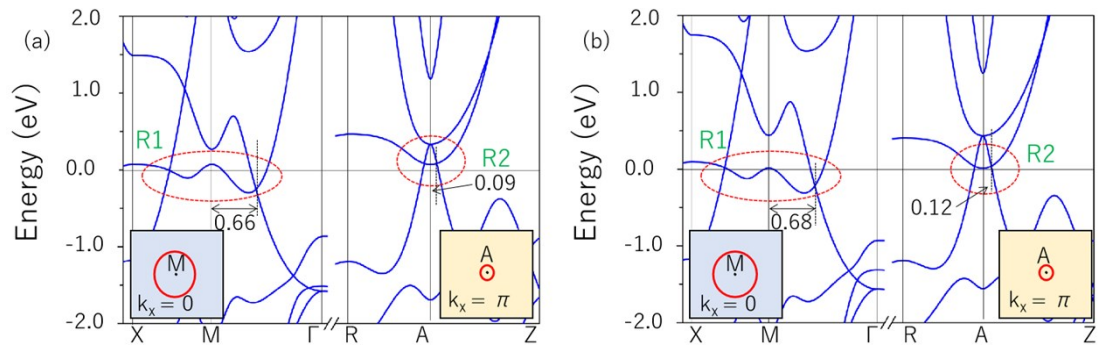

Fig. S7. Calculated band structures for quasi-2D  $\alpha$ -FeSi<sub>2</sub> under 1% and 2% biaxial strains.

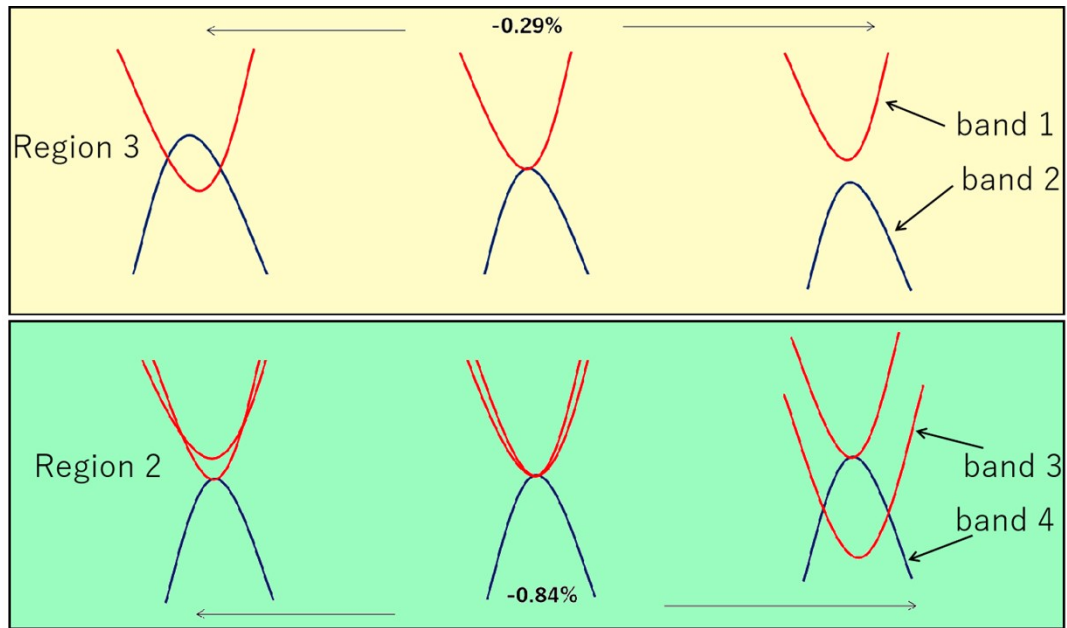

Fig. S8. Schematic diagrams of the changing of opposite-pockets-like bands near Fermi level in R3 and R2, respectively, in the range of -2% to +2% biaxial strain.



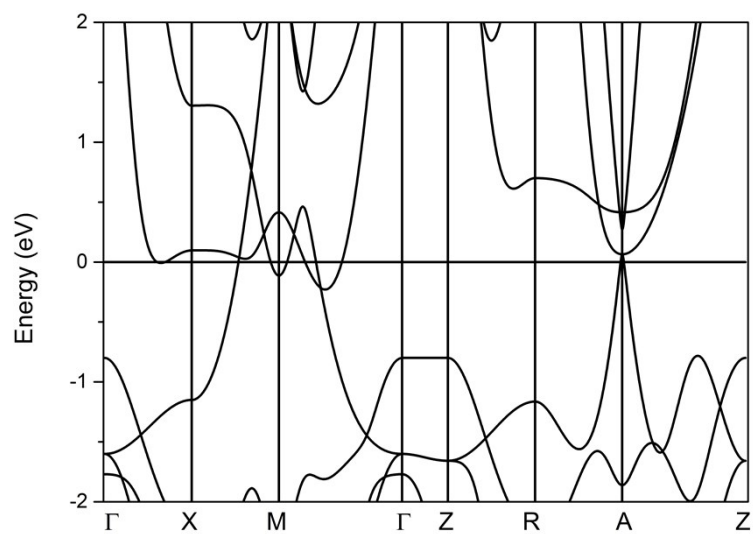

Figure S9: band structure of  $\alpha$ -FeSi<sub>2</sub> calculated by TPSS MGGA method at 0% strain.

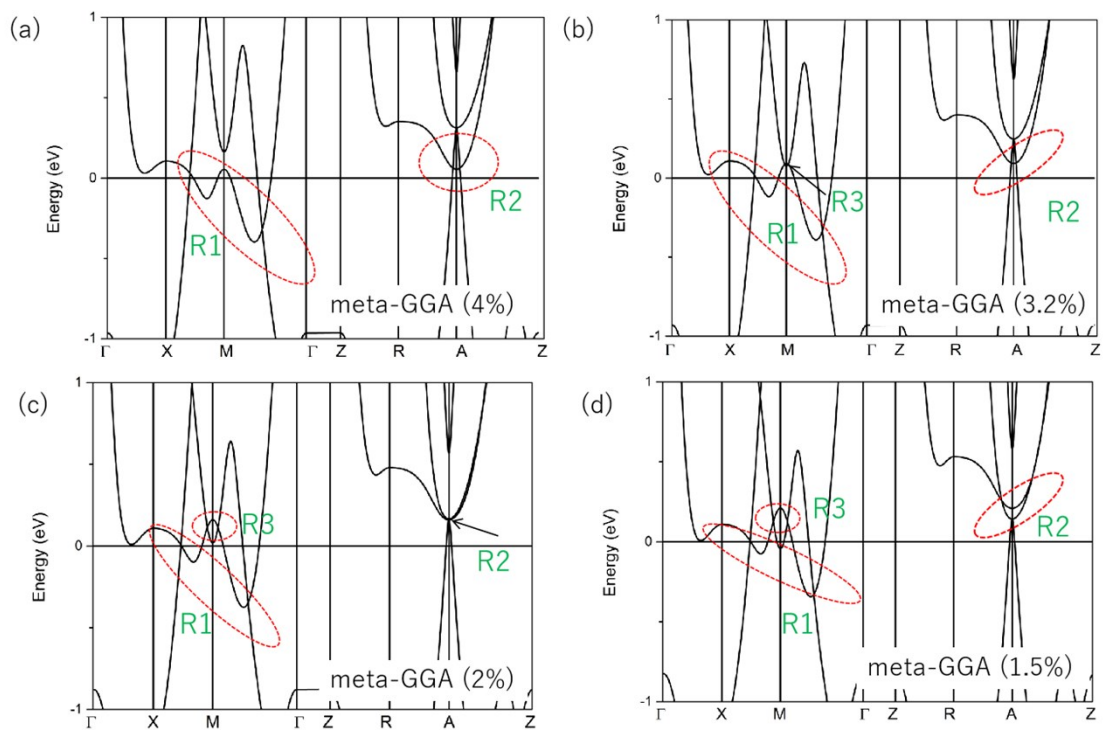

Figure S10: calculated band structures of  $\alpha$ -FeSi<sub>2</sub> calculated by TPSS MGGA method at different strains.
